# Supplementary material
Source: publisher figshare collection journal article supplement (https://springernature.figshare.com/ndownloader/files/13032830)
Supplement: Supplementary file [file 13032830]

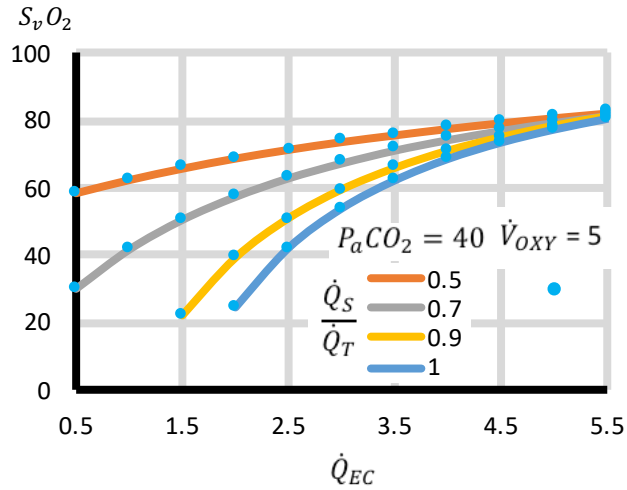

**Supplementary Figure 1. Effect on  $S_{\bar{v}}O_2$  of different approaches to managing  $\dot{V}_{SWEEP}$ .**

Results for when  $P_aCO_2$  is held constant at 40 mm Hg by varying  $\dot{V}_{SWEEP}$  (continuous lines) compared to when  $\dot{V}_{SWEEP}$  is held constant at 5 l/min (data points as blue markers). As  $\dot{Q}_{EC}$  increases  $S_{\bar{v}}O_2$  rises. The higher the  $\frac{\dot{Q}_S}{\dot{Q}_T}$ , the higher the  $\dot{Q}_{EC}$  required to achieve “acceptable” values of  $S_{\bar{v}}O_2 > 60\%$ . The blue dots of fixed  $\dot{V}_{SWEEP} = 5$  l/min match the curves of variable  $\dot{V}_{SWEEP}$  (fixed  $P_aCO_2$ ), demonstrating that the approach taken to managing  $\dot{V}_{SWEEP}$  has minimal effect on  $S_{\bar{v}}O_2$ .
